# Supplementary material for: Variability of biological traits of Bulinus truncatus and Biomphalaria pfeifferi, the intermediate host snails of schistosomiasis, from three climatic zones of Côte d’Ivoire
Source: Frontiers journal article supplement (doi:10.3389/fenvs.2023.1193239), 2023-12-07
Supplement: Table_1.xlsx [file Table_1.xlsx]

## Sheet: Btruncatus Torla
ID indiv	Locality	Isolation date	Height	length	Death	date 1è ponte	Hght Week1	lgth week1	Hght Week2	lgth week2	Hght Week3	lgth week3	Hght Week4	lgth week4	Hght Week5	lgth week5	Hght Week6	lgth week6	Hght Week7	lgth week7
Bt 01	Torla	2021-03-30	1.4	1		2021-04-30	2	1.3	2.1	1.9	3.5	2.7	4.1	3.2	5	3.5	5.2	3.5	5.5	3.6
Bt 02	Torla	2021-03-30	1.4	1		2021-04-30	2	1.4	2.2	2	3.4	2.7	4.2	3	5	3.3	5	3.3	5.2	3.4
Bt 03	Torla	2021-03-30	1.4	1.1		2021-05-02	2	1.35	2.3	2.1	3.6	2.8	4	3.1	4.8	3.1	5	3.2	5.1	3.4
Bt 04	Torla	2021-03-30	1.5	1.2		2021-04-29	2.19	1.3	2.2	2	3.2	2.8	4	3.2	5	3.4	5.4	3.6	5.8	3.9
Bt 05	Torla	2021-03-30	1.4	1.1		2021-05-02	2	1.35	2.7	2.2	3.3	2.7	4.2	3.1	5	3.2	5.1	3.4	5.3	3.4
Bt 06	Torla	2021-03-30	1.5	1.2		2021-05-03	2.1	1.4	2.4	2.1	3.4	2.8	4.1	3.1	4.9	3.3	5.2	3.4	5.3	3.6
Bt 07	Torla	2021-03-30	1.5	1.2		2021-04-26	2	1.35	2.4	2.1	3.4	2.8	4.1	3.1	4.9	3.3	5.2	3.4	5.3	3.6
Bt 08	Torla	2021-03-30	1.5	1.2		2021-04-23	2.1	1.4	2.8	2.3	3.5	2.9	4.3	3.3	5	3.4	5.1	3.5	5.2	3.8
Bt 09	Torla	2021-03-30	1.5	1.2		2021-04-26	2	1.35	2.8	2.1	3.3	2.7	4.1	3.2	5	3.2	5.2	3.4	5.4	3.8
Bt 10	Torla	2021-03-30	1.5	1.2		2021-04-26	2.1	1.4	2.9	2.4	3.1	2.6	3.7	3	4.6	3	4.9	3.3	5.3	3.7
Bt 11	Torla	2021-03-30	1.5	1.2		2021-05-03	2	1.4	2.3	1.8	3	2.1	3.8	3	4.7	3.2	5	3.4	5.1	3.5
Bt 12	Torla	2021-03-30	1.4	1.1		2021-05-02	2	1.3	2.8	1.9	3.2	2.2	4.2	3	4.9	3.2	5.3	3.4	5.7	3.6
Bt 13	Torla	2021-03-30	1.4	1.1		2021-04-23	1.9	1.4	3	2.1	3.8	2.5	4.3	3	4.9	3.2	5.2	3.5	5.4	3.5
Bt 14	Torla	2021-03-30	1.4	1		2021-04-29	2	1.4	2.7	2	3.8	2.4	4.4	3	5	3.1	5.2	3.4	5.4	3.6
Bt 15	Torla	2021-03-30	1.4	1		2021-05-14	1.8	1.3	2	1.5	3.2	2.1	3.3	2.1	3.9	2.4	4.2	3	4.5	3.1
Bt 16	Torla	2021-03-30	1.7	1.3			1.7	1.3	1.7	1.3	1.7	1.3	2	1.7	3	2.2	3.4	2.5	3.9	2.5
Bt 17	Torla	2021-03-30	1.7	1.3		2021-05-16	2.2	1.9	2.2	2	2.8	1.9	3.3	2.5	4	2.9	4.5	3.2	4.7	3.3
Bt 18	Torla	2021-03-30	1.3	1		2021-04-29	2.2	1.4	2.6	2	3.2	2.3	4.1	2.7	4.4	3	4.7	3.3	5	3.4
Bt 19	Torla	2021-03-30	1.3	1		2021-05-02	2	1.3	2	1.8	3.1	2.7	4.3	3.5	5	3.4	5	3.4	5.2	3.5
Bt 20	Torla	2021-03-30	1.3	1		2021-04-26	2	1.3	2.4	2	3.3	2.7	4	3	5	3.2	5.1	3.2	5.3	3.6
Bt 21	Torla	2021-03-30	1.4	1.1		2021-04-27	2	1.4	3	1.9	3.5	2.7	4	3.2	4.4	3.2	4.5	3.3	4.9	3.8
Bt 22	Torla	2021-03-30	1.4	1.1		2021-05-02	2	1.3	2.8	2	3.4	2.8	4	3.1	4.8	3.4	5	3.4	5.4	3.7
Bt 23	Torla	2021-03-30	1.4	1		2021-04-23	2.1	1.3	3	2.1	3.4	2.7	4.8	3.6	5.2	3.7	5.2	3.7	5.7	4.1
Bt 24	Torla	2021-03-30	1.8	1.4		2021-04-29	2	1.3	2.8	2	4.1	3	4.5	3.4	5	3.6	5.3	3.7	5.8	4.3
Bt 25	Torla	2021-03-30	1.9	1.5		2021-04-23	2.8	2	3.1	2.3	3.9	2.5	4.5	3	5	3.4	5.1	3.4	5.7	4
Bt 26	Torla	2021-03-30	1.6	1.3		2021-04-23	2.9	2	3.1	2.5	3.8	3	4.2	3.7	4.9	3.6	5.2	3.6	5.2	3.6
Bt 27	Torla	2021-03-30	1.6	1.3	2021-04-10	2021-04-23	2.4	1.8	3	2.5	3.9	3	4.7	3.3	4.9	3.7	0	0	0	0
Bt 28	Torla	2021-03-30	1.7	1.3		2021-04-26	2.3	1.8	3	2.1	4.2	3.1	4.9	3.6	5.2	3.6	5.3	3.6	5.7	4.1
Bt 29	Torla	2021-03-30	1.5	1.3		2021-04-26	2.4	1.9	3.3	2.4	4.1	3	4.8	3.4	5.3	3.6	5.5	3.7	5.9	4.2
Bt 30	Torla	2021-03-30	1.7	1.3		2021-04-23	2.3	1.8	3.3	2.4	4.1	3	4.9	3.3	5.5	3.7	5.7	3.8	5.9	4.2
Bt 31	Torla	2021-03-30	1.8	1.4		2021-04-26	2.3	2	3	2.5	4.9	3.2	4.9	3.7	5.4	3.9	5.4	3.9	5.7	4.1
Bt 32	Torla	2021-03-30	1.5	1.2		2021-04-26	2.5	2	3.1	2.6	4.2	3	4.5	3.2	5.4	3.5	5.5	3.7	5.8	4.2
Bt 33	Torla	2021-03-30	1.5	1.21		2021-05-03	2.8	1.9	3.3	2.5	4.4	3.2	4.8	3.2	5.5	3.6	5.6	3.6	5.7	3.6
Bt 34	Torla	2021-03-30	1.3	1		2021-04-21	2.3	1.9	3.7	2.6	4.1	3	4.8	3.4	5.3	3.7	5.7	4	5.7	4.1
Bt 35	Torla	2021-03-30	1.3	1		2021-05-04	1.7	1.4	2.4	1.8	3.8	2.3	4.3	3.2	4.7	3.4	5	3.5	5.5	3.9
Bt 36	Torla	2021-03-30	1.8	1.4		2021-04-24	2.1	1.4	3	2	3.5	2.8	4.2	3.3	5.3	3.7	5.5	3.8	5.7	3.9
Bt 37	Torla	2021-03-30	1.8	1.4		2021-04-26	2.1	1.8	2.9	2.4	4.1	3	4.2	3.1	4.9	3.4	5.2	3.6	5.5	3.8
Bt 38	Torla	2021-03-30	1.5	1.2		2021-04-21	2.4	1.7	3.1	2.3	4.2	3.2	4.7	3.3	5.2	3.6	5.7	4.2	5.9	4.2
Bt 39	Torla	2021-03-30	1.3	1.1		2021-04-24	2	1.7	2.9	2.1	3.9	3	4.4	3.1	5.1	3.5	5.6	4.1	5.6	4.2
Bt 40	Torla	2021-03-30	1.4	1.1		2021-04-27	2.1	1.4	3	2.2	4	3	4.8	3.3	5.2	3.4	5.6	3.9	5.9	3.9
Bt 41	Torla	2021-03-30	1.4	1.1		2021-05-02	1.7	1.3	2.3	1.8	3.2	2.2	4.3	3.1	4.7	3.3	5.2	3.8	5.7	4
Bt 42	Torla	2021-03-30	1.4	1.1		2021-05-02	1.8	1.4	2.4	1.8	3.3	2.5	4.1	3	4.6	3.3	5.1	3.7	5.6	4.2
Bt 43	Torla	2021-03-30	1.3	1.1		2021-05-02	2.1	1.7	3	2.1	3.9	2.8	4	3.1	4.9	3.5	5.4	3.9	5.9	4.2
Bt 44	Torla	2021-03-30	1.3	1		2021-04-21	2	1.8	3	2.2	4.1	3	4.6	3.3	5.2	3.5	5.6	3.9	5.9	4.1
Bt 45	Torla	2021-03-30	1.7	1.4		2021-05-03	2	1.3	2.8	2	3.8	2.9	4.6	3.2	4.8	3.4	5.3	3.8	5.8	4.2
Bt 46	Torla	2021-03-30	1.4	1.1		2021-04-21	2.2	1.9	3.1	2.3	4.5	3.1	4.5	3.2	5	3.4	5.4	3.8	5.4	3.8
Bt 47	Torla	2021-03-30	1.3	1		2021-05-03	2	1.5	2.8	2	4.1	2.8	4.1	3	5	3.3	5.5	3.9	5.7	4.1
Bt 48	Torla	2021-03-30	1.4	1.2		2021-04-23	2.1	1.9	3	2.1	4	2.9	4.6	3.2	4.9	3.6	5.4	3.8	5.8	4.2
Bt 49	Torla	2021-03-30	1.5	1.3		2021-04-29	1.9	1.4	2.3	1.7	3.6	2.3	4.3	3.2	5.2	3.4	5.7	4	6.1	4.5
Bt 50	Torla	2021-03-30	1.5	1.3		2021-04-27	2	1.5	2.6	2	3.9	2.8	4.8	3.1	5	3.3	5.5	3.9	5.9	4.2

## Sheet: Btruncatus Raffiekro
ID indiv	Localité	Isolation date	Death	Hght Week1	lgth week1	Hght Week2	lgth week2	Hght Week3	lgth week3	Hght Week4	lgth week4	Hght Week5	lgth week5	Hght Week6	lgth week6	Hght Week7	lgth week7
Bt 01	Raffierkro	2021-03-31		2	1.6	2.9	2.1	3.7	3	4.2	3.6	4.7	3.6	5.1	4.1	5.4	4.3
Bt 02	Raffierkro	2021-03-31		2	1.6	2.6	2.3	3.6	3.1	4.3	3.6	5	3.8	5.3	4	5.6	4.1
Bt 03	Raffierkro	2021-03-31		2	1.5	2.8	2	3.7	2.9	4.7	3.5	5	3.8	5.1	3.8	5.3	3.9
Bt 04	Raffierkro	2021-03-31		2.1	1.6	2.9	2	4.1	3	5	3.7	5.7	4	5.9	4.1	5.9	4.1
Bt 05	Raffierkro	2021-03-31		2.1	1.7	3.1	2.1	4.1	3.1	4.2	3.5	5.3	3.6	5.3	3.7	5.5	3.9
Bt 06	Raffierkro	2021-03-31		2.2	1.7	3.3	2.1	4.1	3	4.4	3.4	4.9	3.4	5.2	3.6	5.5	4
Bt 07	Raffierkro	2021-03-31	2021-05-04	2	1.7	3	2	3.4	2.7	4.1	3					0	0
Bt 08	Raffierkro	2021-03-31		2	1.5	2.7	2.4	3	2.5	4	3	4.4	3.2	4.6	3.3	4.9	3.5
Bt 09	Raffierkro	2021-03-31		2.1	1.8	3.2	2.1	3.4	2.8	4	3	4.3	3.1	4.5	3.3	5	3.6
Bt 10	Raffierkro	2021-03-31		2.1	1.8	3	2.1	3.7	3	4.2	3.2	5.1	3.5	5.5	3.8	5.7	4
Bt 11	Raffierkro	2021-03-31		2.4	1.8	3.3	2.2	4	3.1	4.7	3.4	5.2	3.4	5.2	3.4	5.6	3.8
Bt 12	Raffierkro	2021-03-31	2021-05-05	2.3	1.6	2.9	1.8	3.7	2.8	4.2	3.2	0	0	0	0	0	0
Bt 13	Raffierkro	2021-03-31	2021-05-04	2.7	2	3.7	2.4
Bt 14	Raffierkro	2021-03-31		2.8	2	3.8	2.7	5.2	3.5	4.3	3.2	5	3.4	5.3	3.5	5.5	3.8
Bt 15	Raffierkro	2021-03-31	2021-04-30	2.1	1.6	3	2.1	3.4	2.9	4	3.1
Bt 16	Raffierkro	2021-03-31		2.1	1.7	3	2.1	3.8	3	4.3	3.5	4.6	3.5	4.6	3.5	4.9	3.7
Bt 17	Raffierkro	2021-03-31		1.8	1.3	2.5	1.7	3.4	2.6	4.3	3.1	5	3.4	5.5	3.8	5.7	4
Bt 18	Raffierkro	2021-03-31		1.9	1.3	2.7	1.8	3.2	2.8	3.9	3.1	4.2	3.3	4.7	3.6	5.2	3.9
Bt 19	Raffierkro	2021-03-31	2021-05-10	2.3	1.6	2.9	2	3.9	3	4.5	3.5	4.9	3.6
Bt 20	Raffierkro	2021-03-31	2021-05-07	2	1.7	3	2.4	3.9	3	4.3	3.6	5	3.8
Bt 21	Raffierkro	2021-03-31		2.2	1.7	3	2.1	3.4	2.8	4.2	3.4	4.7	3.4	5.1	3.7	5.7	4.1
Bt 22	Raffierkro	2021-03-31		1.8	1.5	2.5	1.7	3.1	2.7	3.9	3	4.5	3.2	5.1	3.8	5.7	4.2
Bt 23	Raffierkro	2021-03-31		2.3	1.9	3.5	2.7	4.1	3.4	4.7	3.7	5.1	3.8	5.6	4	5.9	4.4
Bt 24	Raffierkro	2021-03-31	2021-04-29	2.3	1.7	3	2.5	3.5	2.9	4.2	3.2	4.6	0	0	0	0	0
Bt 25	Raffierkro	2021-03-31	2021-05-02	2.1	1.7	2.6	2.1	3.2	2.9	4.2	3.2	4.4	3.4	0	0	0	0
Bt 26	Raffierkro	2021-03-31		2	1.5	3	2.3	3.3	2.7	3.7	2.9	4.4	3.2	4.8	3.5
Bt 27	Raffierkro	2021-03-31		1.9	1.7	2.9	2.2	3.4	2.8	4	3.2	4.3	3.4	4.6	3.4	4.9	3.6
Bt 28	Raffierkro	2021-03-31	2021-05-03	2	1.7	3	2.2	3.3	2.7	4	3	4.6	3.3	4.8	3.4	5.2	3.8
Bt 29	Raffierkro	2021-03-31		2	1.9	2.8	2.1	3.2	2.9	4	3.2	4.4	3.4	4.8	3.5	4.9	3.5
Bt 30	Raffierkro	2021-03-31		2	1.7	2.7	2.2	3.3	2.7	4	3	4.6	3.3	4.9	3.5	5	3.9
Bt 31	Raffierkro	2021-03-31		2	1.8	3.1	2.4	3.2	2.7	4.5	3.4	5.1	3.7	5.4	3.9	5.6	4
Bt 32	Raffierkro	2021-03-31		2	1.7	2.7	1.8	4	3.1	4	3	4.3	3.1	4.5	3.3	4.8	3.5
Bt 33	Raffierkro	2021-03-31		2	1.7	3.3	2.1	3.2	2.7	4	3.1	4.5	3.2	4.5	3.2	4.9	3.4
Bt 34	Raffierkro	2021-03-31		2	1.7	2.8	2.2	3.9	3	4.2	3.1	4.7	3.3	4.9	3.4	5.2	3.6
Bt 35	Raffierkro	2021-03-31		2.2	1.9	3.2	2.3	3.4	2.7	4.2	3.3	4.9	3.5	4.9	3.5	5.3	3.6
Bt 36	Raffierkro	2021-03-31		2.3	1.9	2.9	2.3	3.9	3.2	4.2	3.2	4.7	3.5	4.8	3.5	5.5	4
Bt 37	Raffierkro	2021-03-31		2	1.7	2.5	1.8	3.6	2.5	3.6	2.6	4	2.8	4.5	3.3	4.8	3.5
Bt 38	Raffierkro	2021-03-31		2.2	1.7	2.4	1.8	2.8	2.2	4	3.1	4.5	3.3	4.8	3.5	5.3	3.7
Bt 39	Raffierkro	2021-03-31		2.2	1.9	2.8	2.3	3.1	2.5	4	3.2	4.5	3.4	4.6	3.4	4.9	3.6
Bt 40	Raffierkro	2021-03-31		2.3	2	3.1	2.5	3.6	3	4.5	3.2	4.8	3.3	4.8	3.4	5.3	3.5
Bt 41	Raffierkro	2021-03-31		2.2	1.9	3.4	2.3	4	3.1	4.2	3.1	4.6	3.2	4.9	3.4	5.4	3.7
Bt 42	Raffierkro	2021-03-31		2.2	1.8	3.2	2.1	3.4	2.7	3.6	2.5	4.4	3
Bt 43	Raffierkro	2021-03-31	2021-05-09	2.3	1.7	3.1	2.1	3.9	3	3.9	3	4.2	3	4.6	3.3	4.9	3.7
Bt 44	Raffierkro	2021-03-31		2	1.8	3	2	3.7	2.9	4.4	3	4.6	3.1	4.8	3.2	4.8	3.2
Bt 45	Raffierkro	2021-03-31		2	1.7	2.9	2	3.7	3	4.4	3.2
Bt 46	Raffierkro	2021-03-31	2021-05-02	2	1.7	3	1.8	3.6	2.8	3.8	2.9	4.4	3	5	3.3	5.5	3.9
Bt 47	Raffierkro	2021-03-31		2.2	1.8	3.1	2	3.9	2.9	4.4	3	5	3.3	5.4	3.6	5.6	3.8
Bt 48	Raffierkro	2021-03-31	2021-04-27	2.5	1.8	3.3	2.4	3.3	2.6
Bt 49	Raffierkro	2021-03-31		2.1	1.6	2.9	2	3.3	2.7	3.3	2.8	4.4	3	4.9	3.4	5.5	3.9
Bt 50	Raffierkro	2021-03-31		2.1	1.6	2.9	1.8	3.5	2.8	4.6	3.4	5	3.6	5.4	3.9	5.6	4

## Sheet: Bipfeifferi Diasson
ID indiv	Localité	Isolation date	Isolation Size	Death	Size Week1.	Size Week2.	Size Week3.	Size Week4.	Size Week5.	Size Week6.	Size Week7.
Bp 01	Diasson	2021-04-08	1.9		2	3.4	4.5	5	5.2	5.4	5.6
Bp 02	Diasson	2021-04-08	1.8		2.1	3.4	3.6	4	4.6	5.1	5.1
Bp 03	Diasson	2021-04-08	1.5		1.9	3.1	3.6	4	4.5	4.5	4.8
Bp 04	Diasson	2021-04-08	1.5		12	3	3.5	4.3	5	5.2	5.3
Bp 05	Diasson	2021-04-08	1.5	2021-05-20	2.1	3.2	3.8	4.2	4.7	5.1	5.4
Bp 06	Diasson	2021-04-08	1.8		2	3.2	3.9	4.2	4.4	0	0
Bp 07	Diasson	2021-04-08	1.3		1.8	2.6	3	4.1	4.2	4.2	4.6
Bp 08	Diasson	2021-04-08	1.1		1.4	1.6	1.8	2.6	2.9	3.9	4.1
Bp 09	Diasson	2021-04-08	1.4	2021-05-10	1.8	3	3.2	4.2	0	0	0
Bp 10	Diasson	2021-04-08	1.3		1.7	2.8	3.3	4.3	4.5	5.3	5.3
Bp 11	Diasson	2021-04-08	1.5		1.7	3	3.5	4.4	4.7	4.7	4.9
Bp 12	Diasson	2021-04-08	1.5		1.8	2.4	3	3.8	4	4.4	4.8
Bp 13	Diasson	2021-04-08	1.4		1.9	2.3	2.8	3.4	3.7	4	4.4
Bp 14	Diasson	2021-04-08	1.4		1.7	2.9	3.4	4.1	4.4	4.7	4.9
Bp 15	Diasson	2021-04-08	1.5		1.9	3.3	3.7	4.3	4.7	4.7	5
Bp 16	Diasson	2021-04-08	1.4		1.6	2.7	3	3.8	4	4	4.3
Bp 17	Diasson	2021-04-08	1.4		1.9	3.1	3.5	4.5	5.2	5.3	5.6
Bp 18	Diasson	2021-04-08	1.4		1.6	2.1	2.6	3.2	3.9	4.5	5.1
Bp 19	Diasson	2021-04-08	1.3		1.8	3.4	4	4.3	4.9	5	5.3
Bp 20	Diasson	2021-04-08	1.3		1.9	2.9	3.2	4.2	4.9	4.9	5.3
Bp 21	Diasson	2021-04-08	1.3		1.6	3.1	3.5	4	4.8	4.8	4.9
Bp 22	Diasson	2021-04-08	1.4		1.7	3.6	4	4.2	4.4	4.4	4.9
Bp 23	Diasson	2021-04-08	1.4		1.6	2	2.5	3.2	3.2	4.3	4.7
Bp 24	Diasson	2021-04-08	1.2		1.8	2.6	3.3	3.8	4.6	4.6	4.9
Bp 25	Diasson	2021-04-08	1.2	2021-04-21	1.8	3	0	0	0	0	0
Bp 26	Diasson	2021-04-08	1.4		1.7	3.3	4	4.2	4.8	4.9	4.9
Bp 27	Diasson	2021-04-08	1.4	2021-05-10	1.7	3.3	3.7	4.8	4.9	5.1	5.3
Bp 28	Diasson	2021-04-08	1.3		1.6	3.2	3.9	4.2	4.5	4.5	4.7
Bp 29	Diasson	2021-04-08	1.5		1.5	2.9	3.9	3.9	4.5	4.5	4.9
Bp 30	Diasson	2021-04-08	1.3		1.7	2.7	3.1	3.3	3.5	4	4.2
Bp 31	Diasson	2021-04-08	1.3		1.8	2.9	3.3	4.5	4.5	4.7	4.9
Bp 32	Diasson	2021-04-08	1.4		1.7	3.4	3.9	4.5	4.5	4.9	5.1
Bp 33	Diasson	2021-04-08	1.4		1.8	1.9	2.1	3.1	3.1	3.2	3.4
Bp 34	Diasson	2021-04-08	1.4	1951-05-05	1.4	1.4	1.7	0	0	0	0
Bp 35	Diasson	2021-04-08	1.3		1.8	3	3.3	4.8	4.8	4.8	5.4
Bp 36	Diasson	2021-04-08	1.2		1.9	3.5	4.3	4.8	4.8	5.1	5.5
Bp 37	Diasson	2021-04-08	1.2		1.5	2.8	3.1	4.8	4.8	5.2	5.4
Bp 38	Diasson	2021-04-08	1.3		1.5	3.1	3.7	4.7	4.7	4.8	4.9
Bp 39	Diasson	2021-04-08	1.3		1.6	3.2	4	4.8	4.8	4.9	5.2
Bp 40	Diasson	2021-04-08	1.3		1.7	3.4	3.9	4.8	4.8	4.8	5.3
Bp 41	Diasson	2021-04-08	1.2		1.5	3.4	4	4.3	4.3	4.9	0
Bp 42	Diasson	2021-04-08	1.3		1.7	1.8	2.9	3.9	3.9	4.1	4.6
Bp 43	Diasson	2021-04-08	1.4		1.9	2.3	3.3	4.4	4.4	4.7	5.1
Bp 44	Diasson	2021-04-08	1.4		1.8	2.1	2.8	4.5	4.5	5.4	5.7
Bp 45	Diasson	2021-04-08	1.5	2021-05-03	1.7	2.9	3.4	0	0	0	0
Bp 46	Diasson	2021-04-08	1.3		1.8	3.2	3.9	5	5	5.1	5.5
Bp 47	Diasson	2021-04-08	1.7		2.4	3.5	4	5.9	5.9	6.1	6.6
Bp 48	Diasson	2021-04-08	1.3		1.8	3	3.3	4.6	4.6	4.7	4.9
Bp 49	Diasson	2021-04-08	1.4		1.9	3.2	3.8	5	5	5.8	6.3
Bp 50	Diasson	2021-04-08	1.4		2.1	3.4	4	5.5	5.5	5.8	6

## Sheet: Bipfeifferi Raffiekro
Idindiv	Locality	Isolation date	Isolation size	Size Week1.	Size Week2.	Size Week3.	Size Week4.	Size Week5.	Size Week6.	Size Week7.
Bp 01	Raffierkro	2021-04-09	1.4	1.8	3.6	2.9	4.2	4	4.8	5
Bp 02	Raffierkro	2021-04-09	1.3	1.9	3.4	2.4	4.3	4.7	4.7	4.7
Bp 03	Raffierkro	2021-04-09	1.8	2	3.5	2.1	4.1	4.3	4.4	4.5
Bp 04	Raffierkro	2021-04-09	1.9	2	3.4	2.4	4.2	4.6	4.8	4.8
Bp 05	Raffierkro	2021-04-09	1.5	1.5	2	1.7	2.5	2.8	3.4	4.1
Bp 06	Raffierkro	2021-04-09	1.5	1.6	2.8	2.5	3.3	3.6	4.1	4.4
Bp 07	Raffierkro	2021-04-09	1.5	1.6	2	2	2.1	2.4	3.2	3.8
Bp 08	Raffierkro	2021-04-09	1.5	1.6	3	2.4	3.4	3.6	3.8	3.9
Bp 09	Raffierkro	2021-04-09	1.5	1.6	3	2.1	3.3	3.6	3.7	3.9
Bp 10	Raffierkro	2021-04-09	1.4	1.4	2.8	2	3	3.6	4	4.4
Bp 11	Raffierkro	2021-04-09	1.4	1.5	2.3	2.1	2.8	3	3.1	3.6
Bp 12	Raffierkro	2021-04-09	1.5	1.5	2.7	2.3	3.3	3.6	3.8	4.2
Bp 13	Raffierkro	2021-04-09	1.4	1.4	2.5	1.8	3.3	3.8	4.8	5.2
Bp 14	Raffierkro	2021-04-09	1.6	1.4	2.3	2	3	3.3	4.2	4.8
Bp 15	Raffierkro	2021-04-09	1.7	1.9	2.2	2.2	3.6	4.2	4.8	5.5
Bp 16	Raffierkro	2021-04-09	1.5	1.6	3	2.2	3.4	4.1	4.4	4.8
Bp 17	Raffierkro	2021-04-09	1.6	1.7	2.8	2	2.2	2.9	3.5	3.8
Bp 18	Raffierkro	2021-04-09	1.5	1.6	2.5	1.9	3	3.1	3.4	3.7
Bp 19	Raffierkro	2021-04-09	1.7	1.2	3	2	3	3.4	4.4	4.6
Bp 20	Raffierkro	2021-04-09	1.7	1.8	3	1.9	3.3	3.5	3.8	4.2
Bp 21	Raffierkro	2021-04-09	1.3	1.4	2.2	2.2	2.9	3.1	3.3	3.5
Bp 22	Raffierkro	2021-04-09	1.4	1.4	2.1	2.6	3.2	3.6	4.2	4.6
Bp 23	Raffierkro	2021-04-09	1.5	1.6	1.7	3	3.4
Bp 24	Raffierkro	2021-04-09	1.5	1.6	1.9	2.3	3	3.4	3.9	4.5
Bp 25	Raffierkro	2021-04-09	1.4	1.4	1.7	2.5	2.7	3	3.3	3.5
Bp 26	Raffierkro	2021-04-09	1.3	1.3	1.7	2.2	2.5	2.9	3.1	3.4
Bp 27	Raffierkro	2021-04-09	1.2	1.4	2	2.1	3	3.2	3.5	3.6
Bp 28	Raffierkro	2021-04-09	1.6	1.6	2	2.9	3.2	3.6	4.3	4.3
Bp 29	Raffierkro	2021-04-09	1.3	1.6	1.8	3	3.7	4.6	5.4	5.5
Bp 30	Raffierkro	2021-04-09	1.3	1.8	2.1	2.2	2.9	3.5	3.9	4.1
Bp 31	Raffierkro	2021-04-09	1.4	1.4	2	2.2	3	3.4	3.6	3.8
Bp 32	Raffierkro	2021-04-09	1.3	1.3	2	2.1	2.8	3.3	3.5	3.9
Bp 33	Raffierkro	2021-04-09	1.2	1.6	1.8	1.8	2.3	2.8	3.2	3.4
Bp 34	Raffierkro	2021-04-09	1.5	1.5	1.7	2	2.3	3.1	3.4	3.5
Bp 35	Raffierkro	2021-04-09	1.5	1.5	2.1	2.6	3.3	3.8	4	4.1
Bp 36	Raffierkro	2021-04-09	1.4	1.5	1.9	2.2	3.1	3.5	3.9	4.2
Bp 37	Raffierkro	2021-04-09	1.4	1.4	1.7	2.2	0	0	0	0
Bp 38	Raffierkro	2021-04-09	1.2	1.4	1.8	2	3	3.5	3.6	3.8
Bp 39	Raffierkro	2021-04-09	1.3	1.3	2	2.3	3	3.2	3.3	3.3
Bp 40	Raffierkro	2021-04-09	1.7	1.6	1.9	2.5	3	3.6	3.6	3.9
Bp 41	Raffierkro	2021-04-09	1.7	1.6	2.1	2	2.4	2.7	3.3	3.5
Bp 42	Raffierkro	2021-04-09	1.5	1.4	2	2.4	3.2	3.9	4.5	4.6
Bp 43	Raffierkro	2021-04-09	1.3	1.5	1.9	2.9	3.6	4.5	4.6	4.6
Bp 44	Raffierkro	2021-04-09	1.3	1.3	1.6	2.2	3	3.7	4.1	4.1
Bp 45	Raffierkro	2021-04-09	1.3	1.4	2	2.4	3.2	4.1	4.5	4.8
Bp 46	Raffierkro	2021-04-09	1.3	1.4	1.9	2.2	3.3	4.2	4.3	4.5
Bp 47	Raffierkro	2021-04-09	1.3	1.4	2.2	1.9	2.8	3.4	3.5	3.9
Bp 48	Raffierkro	2021-04-09	1.3	1.3	1.9	2	2.8	4	4.4	4.6
Bp 49	Raffierkro	2021-04-09	1.3	1.3	2.3	2.7	2.9	3.5	4	4.2
Bp 50	Raffierkro	2021-04-09	1.3	1.4	2	2.4	3.2	3.6	4.1	4.3
